# Normal Saline for Kidney Transplantation Surgery: Less Is More

Duminda N. Wijeyesundera, M.D., Ph.D., Stuart A. McCluskey, M.D., Ph.D.

By 2030, 1 million people in the United States will have end-stage renal disease.<sup>1</sup> Kidney transplantation is a critically important intervention for these individuals: transplantation improves survival, quality of life, and healthcare costs compared to maintenance dialysis.<sup>2-5</sup> Regrettably, the supply of transplantable organs remains inadequate.<sup>6</sup> Hence, optimization of the short-term and long-term function of transplanted kidneys is critically important. Transplanted kidneys are vulnerable to acute kidney injury (AKI) related to hemodynamic instability,<sup>7</sup> hypovolemia,<sup>8</sup> immunologic injury, and ischemia-reperfusion injury.<sup>9</sup> After 25 to 30% of deceased donor kidney transplantation procedures in the United States, such perioperative AKI leads to delayed graft function,<sup>10</sup> which is typically defined as the need for dialysis within a week after transplantation.<sup>9</sup> This incidence is likely to increase even further with increased reliance on marginal kidneys from expanded criteria donors or donation after circulatory death. Delayed graft function has important long-term implications, with the risks of subsequent graft loss increased by 40%.<sup>11</sup> Since anesthesiologists are responsible for maintaining physiologic homeostasis during the perioperative period, they have an important potential role in preventing delayed graft function and thereby optimizing the function of transplanted kidneys.

In this issue of *ANESTHESIOLOGY*, Kolodzie *et al.* present a retrospective cohort study that evaluated the impact of an important facet of perioperative management, namely choice of crystalloid solution, on delayed graft function.<sup>12</sup> They found that administration of high proportions of normal saline (greater than 80% of crystalloid volume)

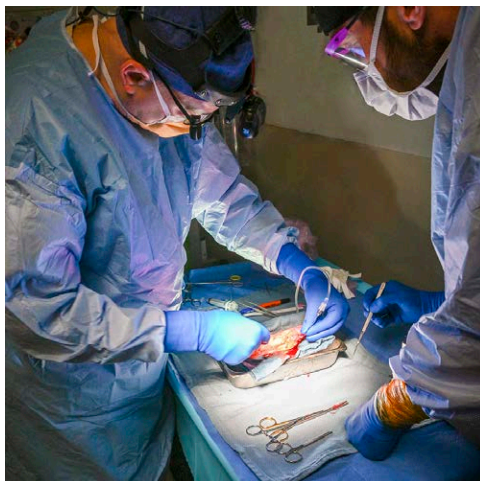

**“...anesthesiologists...have an important potential role in preventing delayed graft function and thereby optimizing the function of transplanted kidneys.”**

in the operating room and postanesthesia care unit was associated with a 55% increased odds of delayed graft function. The finding was robust in sensitivity analyses that accounted for missing prognostic data, focused on deceased donor transplantation, and excluded patients who were not dialysis-dependent before surgery. The study has notable strengths. With 2,515 procedures and 485 primary outcome events, the cohort was sufficiently large for estimation of robust regression models. The investigators also efficiently assembled this cohort by linking electronic anesthesia records to the national Scientific Registry of Transplant Recipients, an approach worth repeating to evaluate other perioperative risk factors for posttransplantation outcomes. Conversely, there are several limitations. First, the overall strength of evidence for an association between proportion of normal saline administered and delayed graft function was not compelling ( $P = 0.049$ ). Second, the cohort characterized care at a single large academic center in the United States, thereby raising concerns about its generalizability. Third, high proportions of normal saline were administered disproportionately in the early study period (2005 to 2009) *versus* the more contemporary period (2012 to 2015). Important changes in transplantation management (*e.g.*, immunosuppression regimens) occurred over this timeframe. Residual unmeasured confounding may therefore have contributed to the observed association between normal saline administration and delayed graft function. Fourth, modification of the definition of high-normal saline use to a volume-based threshold (greater than 2 l) led to its association with delayed graft

Image: J. P. Rathmell.

This editorial accompanies the article on p. 621.

Accepted for publication July 22, 2021. From the Department of Anesthesia, and Li Ka Shing Knowledge Institute, St. Michael's Hospital, Toronto, Canada (D.N.W.); the Department of Anesthesiology and Pain Medicine (D.N.W., S.A.M.), and Institute of Health Policy Management and Evaluation (D.N.W.), University of Toronto, Toronto, Canada; and the Department of Anesthesia and Pain Management, and Multiorgan Transplant Program, University Health Network, Toronto, Canada (S.A.M.).

Copyright © 2021, the American Society of Anesthesiologists. All Rights Reserved. *Anesthesiology* 2021; 135:564–7. DOI: 10.1097/ALN.0000000000003948

function not meeting criteria for statistical significance (odds ratio, 1.48; 95% CI, 0.95 to 2.29;  $P = 0.08$ ).

Should clinicians conclude that normal saline has significant risks with respect to delayed graft function after kidney transplantation? Replicability is a key aspect of scientific investigation,<sup>13</sup> yet the association between normal saline administration and delayed graft function has only been observed in the current study and a previous single-center cohort of 97 patients.<sup>14</sup> Thus, further research remains needed to establish whether the association is robust. Nonetheless, anesthesiologists should reasonably ask whether there are any compelling *advantages* to normal saline as the preferred crystalloid solution for kidney transplantation. The traditional rationale for prioritizing normal saline has been to avoid the theoretical risk of hyperkalemia induced by the potassium content (4 to 5 mEq/l) of balanced crystalloids.<sup>15</sup> Yet the assumption that normal saline reduces the risk of hyperkalemia is too simplistic. Instead, it may lead to a hyperchloremic metabolic acidosis that causes hyperkalemia. These unintended consequences have been observed in randomized trials and meta-analyses, where normal saline increased risks of acidosis and possibly hyperkalemia when compared to balanced crystalloids.<sup>16,17</sup> Based on these data, a recent consensus statement from the American Society of Anesthesiologists (Schaumburg, Illinois) states that “balanced crystalloid solutions are associated with a better metabolic profile” and “are therefore preferred” during kidney transplantation.<sup>18</sup>

In addition to direct evidence showing that normal saline does not prevent hyperkalemia in kidney transplantation, indirect evidence suggests that it can plausibly cause AKI. For example, administration of 2 l of normal saline as opposed to balanced crystalloid led to reduced renal artery flow and decreased renal cortical perfusion in a randomized crossover trial of 20 healthy volunteers.<sup>19</sup> Additionally, a randomized trial of 148 patients found that administration of 1.7 l of normal saline as opposed to balanced crystalloid during kidney transplantation led to lower intraoperative blood pressures and increased vasopressor requirements.<sup>20</sup> Consistent with these physiologic data, an increasing body of clinical evidence shows that normal saline leads to AKI in vulnerable patients. In the cluster crossover Isotonic Solutions and Major Adverse Renal Events Trial (SMART) of 15,802 critically ill adults (10.7% 30-day mortality risk), administration of normal saline *versus* balanced crystalloid led to an 8% relative increase in the risk of 30-day death, new dialysis, or persistent renal dysfunction.<sup>21</sup> In the cluster crossover Saline against Lactated Ringer’s or Plasma-Lyte in the Emergency Department (SALT-ED) trial of 13,347 noncritically ill adults (1.5% 30-day mortality risk),<sup>22</sup> administration of normal saline *versus* balanced crystalloid led to a 20% relative increase in the risk of 30-day death, new dialysis, or persistent renal dysfunction. By comparison, in the alternating cohort Saline or Lactated Ringer’s trial of

8,616 healthier adults (0.3% 30-day mortality risk) having colorectal or orthopedic surgery,<sup>23</sup> administration of normal saline *versus* balanced crystalloid had no significant effect on the risks of death and major complications. Median volumes of normal saline administered were relatively low (1 to 2 l) across these trials. Despite the low volumes, risks of AKI were consistently increased in higher-risk patients. Patients having kidney transplantation are arguably high-risk patients; hence, normal saline plausibly has negative impacts on kidney function after transplantation.

On balance, the *preferred* initial choice of crystalloid for kidney transplantation should be a balanced crystalloid solution. At the minimum, high-quality randomized controlled trial evidence suggests that this strategy will reduce risks of acidosis and possibly hyperkalemia. Will a strategy of prioritizing balanced crystalloids also prevent delayed graft function? Perhaps. The Better Evidence for Selecting Transplant Fluids (BEST-Fluids) trial, a large ongoing trial that aims to recruit 800 patients having decreased donor kidney transplantation, will eventually provide more definitive evidence to address this question.<sup>24</sup> Until such data are available, anesthesiologists should view the potential benefits of balanced crystalloids in preventing delayed graft function with some caution. Since delayed graft function has multiple underlying causal mechanisms, it is unlikely that modification of a single component of clinical care—substitution of balanced crystalloid for normal saline—will result in a meaningful reduction in the risk of delayed graft function. For example, substitution of balanced crystalloid for normal saline is unlikely to mitigate risks of delayed graft function within the context of coexisting hypotension or intravascular volume depletion. The choice of preferred crystalloid solution remains but a single component of the overall perioperative hemodynamic management strategy. Based on accumulating evidence on the adverse impact of intraoperative hypotension,<sup>25</sup> as well as the potential benefits of hemodynamic protocols to guide fluid and vasoactive medication administration,<sup>26</sup> multicomponent protocols are likely needed to offer any reasonable possibility of meaningful reductions in the risk of delayed graft function. Such protocols would certainly include a preference for balanced crystalloid, but also incorporate approaches to optimize cardiac preload and achieve individualized blood pressure targets. Anesthesiologists are ideally positioned to design, implement, and rigorously evaluate such multifaceted algorithms. Our profession should take this opportunity to improve outcomes in this very important patient population.

## Research Support

Dr. Wijeyesundera is supported in part by a Merit Award from the Department of Anesthesiology and Pain Medicine at the University of Toronto (Toronto, Canada), and the Endowed Chair in Translational Anesthesiology Research at St. Michael’s Hospital (Toronto, Canada) and the University of Toronto.

## Competing Interests

The authors are not supported by, nor maintain any financial interest in, any commercial activity that may be associated with the topic of this article.

## Correspondence

Address correspondence to Dr. Wijeyesundera: d.wijeyesundera@utoronto.ca

## References

- McCullough KP, Morgenstern H, Saran R, Herman WH, Robinson BM: Projecting ESRD incidence and prevalence in the United States through 2030. *J Am Soc Nephrol* 2019; 30:127–35
- Axelrod DA, Schnitzler MA, Xiao H, Irish W, Tuttle-Newhall E, Chang SH, Kasiske BL, Alhamad T, Lentine KL: An economic assessment of contemporary kidney transplant practice. *Am J Transplant* 2018; 18:1168–76
- Schnuelle P, Lorenz D, Trede M, Van Der Woude FJ: Impact of renal cadaveric transplantation on survival in end-stage renal failure: Evidence for reduced mortality risk compared with hemodialysis during long-term follow-up. *J Am Soc Nephrol* 1998; 9:2135–41
- Rose C, Gill J, Gill JS: Association of kidney transplantation with survival in patients with long dialysis exposure. *Clin J Am Soc Nephrol* 2017; 12:2024–31
- Tonelli M, Wiebe N, Knoll G, Bello A, Browne S, Jadhav D, Klarenbach S, Gill J: Systematic review: Kidney transplantation compared with dialysis in clinically relevant outcomes. *Am J Transplant* 2011; 11:2093–109
- Organ Procurement and Transplantation Network: OPTN metrics. Washington, D.C., U.S. Department of Health and Human Services. Available at: <https://insights.unos.org/OPTN-metrics/>. Accessed June 20, 2021.
- Gingell-Littlejohn M, Koh H, Aitken E, Shiels PG, Geddes C, Kingsmore D, Clancy MJ: Below-target postoperative arterial blood pressure but not central venous pressure is associated with delayed graft function. *Transplant Proc* 2013; 45:46–50
- Bacchi G, Buscaroli A, Fusari M, Neri L, Cappuccilli ML, Carretta E, Stefoni S: The influence of intraoperative central venous pressure on delayed graft function in renal transplantation: A single-center experience. *Transplant Proc* 2010; 42:3387–91
- Perico N, Cattaneo D, Sayegh MH, Remuzzi G: Delayed graft function in kidney transplantation. *Lancet* 2004; 364:1814–27
- Wilk AR, Beck J, Kucheryavaya AY: The Kidney Allocation System (KAS). Washington, D.C., U.S. Department of Health and Human Services, 2017. Available at: [https://unos.org/wp-content/uploads/unos/KAS\\_First-two-years\\_041917.pdf](https://unos.org/wp-content/uploads/unos/KAS_First-two-years_041917.pdf). Accessed June 20, 2021.
- Yarlagadda SG, Coca SG, Formica RN Jr, Poggio ED, Parikh CR: Association between delayed graft function and allograft and patient survival: A systematic review and meta-analysis. *Nephrol Dial Transplant* 2009; 24:1039–47
- Kolodzie K, Cakmakaya OS, Boparai ES, Tavakol M, Feiner JR, Kim MO, Newman TB, Niemann CU: Perioperative normal saline administration and delayed graft function in patients undergoing kidney transplantation: A retrospective cohort study. *ANESTHESIOLOGY* 2021; 135:621–32
- Eisenach JC, Houle TT: Replication to advance science: Changes in anesthesiology. *ANESTHESIOLOGY* 2014; 121:209–11
- Adwaney A, Randall DW, Blunden MJ, Prowle JR, Kirwan CJ: Perioperative Plasma-Lyte use reduces the incidence of renal replacement therapy and hyperkalaemia following renal transplantation when compared with 0.9% saline: A retrospective cohort study. *Clin Kidney J* 2017; 10:838–44
- O'Malley CM, Frumento RJ, Bennett-Guerrero E: Intravenous fluid therapy in renal transplant recipients: Results of a US survey. *Transplant Proc* 2002; 34:3142–5
- Wan S, Roberts MA, Mount P: Normal saline versus lower-chloride solutions for kidney transplantation. *Cochrane Database Syst Rev* 2016; 8:CD010741
- Weinberg L, Harris L, Bellomo R, Ierino FL, Story D, Eastwood G, Collins M, Churilov L, Mount PF: Effects of intraoperative and early postoperative normal saline or Plasma-Lyte 148® on hyperkalaemia in deceased donor renal transplantation: A double-blind randomized trial. *Br J Anaesth* 2017; 119:606–15
- Wagener G, Bezinover D, Wang C, Kroepfl E, Diaz G, Giordano C, West J, Kindscher JD, Moguilevitch M, Nicolau-Raducu R, Planinsic RM, Rosenfeld DM, Lindberg S, Schumann R, Pivalizza EG: Fluid management during kidney transplantation: A consensus statement of the Committee on Transplant Anesthesia of the American Society of Anesthesiologists. *Transplantation* 2020; 105:1677–84
- Chowdhury AH, Cox EF, Francis ST, Lobo DN: A randomized, controlled, double-blind crossover study on the effects of 2-L infusions of 0.9% saline and plasma-lyte® 148 on renal blood flow velocity and renal cortical tissue perfusion in healthy volunteers. *Ann Surg* 2012; 256:18–24
- Pfortmueller C, Funk GC, Potura E, Reiterer C, Luf F, Kabon B, Druml W, Fleischmann E, Lindner G: Acetate-buffered crystalloid infusate versus infusion of 0.9% saline and hemodynamic stability in patients undergoing renal transplantation: Prospective,

- randomized, controlled trial. *Wien Klin Wochenschr* 2017; 129:598–604
21. Semler MW, Self WH, Wanderer JP, Ehrenfeld JM, Wang L, Byrne DW, Stollings JL, Kumar AB, Hughes CG, Hernandez A, Guillaumondegui OD, May AK, Weavind L, Casey JD, Siew ED, Shaw AD, Bernard GR, Rice TW; SMART Investigators and the Pragmatic Critical Care Research Group: Balanced crystalloids *versus* saline in critically ill adults. *N Engl J Med* 2018; 378:829–39
  22. Self WH, Semler MW, Wanderer JP, Wang L, Byrne DW, Collins SP, Slovis CM, Lindsell CJ, Ehrenfeld JM, Siew ED, Shaw AD, Bernard GR, Rice TW; SALT-ED Investigators: Balanced crystalloids *versus* saline in non-critically ill adults. *N Engl J Med* 2018; 378:819–28
  23. Maheshwari K, Turan A, Makarova N, Ma C, Esa WAS, Ruetzler K, Barsoum S, Kuhel AG, Ritchey MR, Higuera-Rueda C, Kopyeva T, Stocchi L, Essber H, Cohen B, Suleiman I, Bajracharya GR, Chelnick D, Mascha EJ, Kurz A, Sessler DI: Saline *versus* lactated Ringer's solution: The Saline or Lactated Ringer's (SOLAR) Trial. *ANESTHESIOLOGY* 2020; 132:614–24
  24. Collins MG, Fahim MA, Pascoe EM, Dansie KB, Hawley CM, Clayton PA, Howard K, Johnson DW, McArthur CJ, McConnochie RC, Mount PE, Reidlinger D, Robison L, Varghese J, Vergara LA, Weinberg L, Chadban SJ; BEST-Fluids Investigators and the Australasian Kidney Trials Network: Study protocol for Better Evidence for Selecting Transplant Fluids (BEST-Fluids): A pragmatic, registry-based, multi-center, double-blind, randomized controlled trial evaluating the effect of intravenous fluid therapy with Plasma-Lyte 148 *versus* 0.9% saline on delayed graft function in deceased donor kidney transplantation. *Trials* 2020; 21:428
  25. Salmasi V, Maheshwari K, Yang D, Mascha EJ, Singh A, Sessler DI, Kurz A: Relationship between intraoperative hypotension, defined by either reduction from baseline or absolute thresholds, and acute kidney and myocardial injury after noncardiac surgery: A retrospective cohort analysis. *ANESTHESIOLOGY* 2017; 126:47–65
  26. Futier E, Lefrant JY, Guinot PG, Godet T, Lorne E, Cuvillon P, Bertran S, Leone M, Pastene B, Piriou V, Molliex S, Albanese J, Julia JM, Tavernier B, Imhoff E, Bazin JE, Constantin JM, Pereira B, Jaber S; INPRESS Study Group: Effect of individualized vs standard blood pressure management strategies on postoperative organ dysfunction among high-risk patients undergoing major surgery: A randomized clinical trial. *JAMA* 2017; 318:1346–57
